# Supplementary material for: ATP Can Efficiently Stabilize Protein through a Unique Mechanism
Source: PubMed Central journal article supplement — JACS Au. 2021 Aug 13;1(10):1766–77. doi: 10.1021/jacsau.1c00316 (PMC8549052; doi:10.1021/jacsau.1c00316), 2021-08-13
Supplement: au1c00316_si_001.pdf [file au1c00316_si_001.pdf]

## Supporting Information

### ATP Can Efficiently Stabilize Protein through a Unique Mechanism

Xinwen Ou,<sup>a,†</sup> Yichong Lao,<sup>a,†</sup> Jingjie Xu,<sup>b,†</sup> Yanee Wutthinitikornkit,<sup>a</sup> Rui Shi,<sup>a</sup>  
Xiangjun Chen,<sup>b,\*</sup> Jingyuan Li<sup>a,\*</sup>

<sup>a</sup>Zhejiang Province Key Laboratory of Quantum Technology and Device, Department of Physics, Zhejiang University, Zheda Road 38, Hangzhou 310027, China.

<sup>b</sup>Eye Center of the Second Affiliated Hospital, Institute of Translational Medicine, School of Medicine, Zhejiang University, Hangzhou 310009, China.

<sup>†</sup>These authors contributed equally.

\*Email: [chenxiangjun@zju.edu.cn](mailto:chenxiangjun@zju.edu.cn) or [jingyuanli@zju.edu.cn](mailto:jingyuanli@zju.edu.cn).

**Table S1.** The residue in ATP-susceptible and ATP-neutral region of lysozyme in a representative trajectory, and the positively-charged and negatively-charged residues are marked in red and blue respectively. The shaded area represents a relatively continuous ATP-susceptible region.

|                        |                                                                                                                                                                                                                                                                                                                                                                                                                                                                |
|------------------------|----------------------------------------------------------------------------------------------------------------------------------------------------------------------------------------------------------------------------------------------------------------------------------------------------------------------------------------------------------------------------------------------------------------------------------------------------------------|
| ATP-susceptible region | 4G, 5R, 6C, 10A, 14R, 33K, 34F, 37N, 38F, 39N, 41Q, 42A, 43T, 44N, 45R, 46N, 47T, 48D, 49G, 50S, 51T, 52D, 59N, 60S, 61R, 62W, 63W, 66D, 68R, 69T, 98I, 101D, 102G, 107A, 108W, 109V, 114R, 125R, 126G, 127C, 128R, 129L                                                                                                                                                                                                                                       |
| ATP-neutral region     | 1K, 2V, 3F, 7E, 8L, 9A, 11A, 12M, 13K, 15H, 16G, 17L, 18D, 19N, 20Y, 21R, 22G, 23Y, 24S, 25L, 26G, 27N, 28W, 29V, 30C, 31A, 32A, 35E, 36S, 40T, 53Y, 54G, 55I, 56L, 57Q, 58I, 64C, 65N, 67G, 70P, 71G, 72S, 73R, 74N, 75L, 76C, 77N, 78I, 79P, 80C, 81S, 82A, 83L, 84L, 85S, 86S, 87D, 88I, 89T, 90A, 91S, 92V, 93N, 94C, 95A, 96K, 97K, 99V, 100S, 103N, 104G, 105M, 106N, 110A, 111W, 112R, 113N, 115C, 116K, 117G, 118T, 119D, 120V, 121Q, 122A, 123W, 124I |

**Table S2.** The residue in ATP-susceptible region of ubiquitin in a representative trajectory, and the positively-charged and negatively-charged residues are marked in red and blue respectively. The shaded area represents a relatively continuous ATP-susceptible region.

|                        |                                                                                          |
|------------------------|------------------------------------------------------------------------------------------|
| ATP-susceptible region | 24E, 39D, 40Q, 42R, 47G, 48K, 49Q, 51E, 52D, 53G, 54R, 55T, 58D, 72R, 73L, 74R, 75G, 76G |
|------------------------|------------------------------------------------------------------------------------------|

**Table S3.** The residue in ATP-susceptible region of malate dehydrogenase in a representative trajectory, and the positively-charged and negatively-charged residues are marked in red and blue respectively. The shaded area represents a relatively continuous ATP-susceptible region.

|                        |                                                                                                                                                                                                                                                                                                                                                                               |
|------------------------|-------------------------------------------------------------------------------------------------------------------------------------------------------------------------------------------------------------------------------------------------------------------------------------------------------------------------------------------------------------------------------|
| ATP-susceptible region | 1S, 2E, 3P, 31K, 32D, 33Q, 34P, 63L, 109K, 138T, 141K, 142S, 254R, 257W, 258F, 259G, 260T, 261P, 262E, 282D, 292K, 293D, 294K, 326A, 327F, 328E, 330L, 331S, 332S, 338R, 364K, 399D, 400V, 401I, 402A, 403T, 408I, 411K, 412D, 424R, 427G, 428M, 429E, 430R, 432D, 474K, 481K, 498Q, 501L, 502K, 503L, 545V, 546K, 550W, 558T, 561Q, 564A, 567I, 568K, 571K, 606D, 615D, 654E |
|------------------------|-------------------------------------------------------------------------------------------------------------------------------------------------------------------------------------------------------------------------------------------------------------------------------------------------------------------------------------------------------------------------------|

**Table S4.** The details of the simulated systems, the initial distance between the protein and the box edge is larger than 3 nm for each system.

| <b>System</b>                   | <b>Initial box size</b>                     | <b>ATP-Mg</b>              | <b>Water molecules</b> | <b>Sodium ions</b> | <b>Chloride ions</b> |
|---------------------------------|---------------------------------------------|----------------------------|------------------------|--------------------|----------------------|
| Lysozyme                        | $12.6 \times 12.6 \times 12.6 \text{ nm}^3$ | 0                          | 63083                  | 181                | 189                  |
| Lysozyme in pure water          | $12.6 \times 12.6 \times 12.6 \text{ nm}^3$ | 0                          | 63445                  | 0                  | 8                    |
| Lysozyme and $\text{MgCl}_2$    | $12.6 \times 12.6 \times 12.6 \text{ nm}^3$ | 0 ATP, 20 $\text{Mg}^{2+}$ | 63023                  | 181                | 229                  |
| Lysozyme and ATP                | $12.6 \times 12.6 \times 12.6 \text{ nm}^3$ | 20 ATP, 0 $\text{Mg}^{2+}$ | 62653                  | 253                | 181                  |
| Ubiquitin                       | $10.0 \times 10.0 \times 10.0 \text{ nm}^3$ | 0                          | 32216                  | 90                 | 90                   |
| Malate dehydrogenase            | $14.4 \times 14.4 \times 14.4 \text{ nm}^3$ | 0                          | 95712                  | 274                | 270                  |
| ATP-Mg                          | $12.6 \times 12.6 \times 12.6 \text{ nm}^3$ | 20                         | 63299                  | 221                | 181                  |
| Lysozyme and ATP-Mg             | $12.6 \times 12.6 \times 12.6 \text{ nm}^3$ | 20                         | 62677                  | 213                | 181                  |
| Ubiquitin and ATP-Mg            | $10.0 \times 10.0 \times 10.0 \text{ nm}^3$ | 10                         | 31981                  | 110                | 90                   |
| Malate dehydrogenase and ATP-Mg | $14.4 \times 14.4 \times 14.4 \text{ nm}^3$ | 30                         | 95079                  | 334                | 270                  |

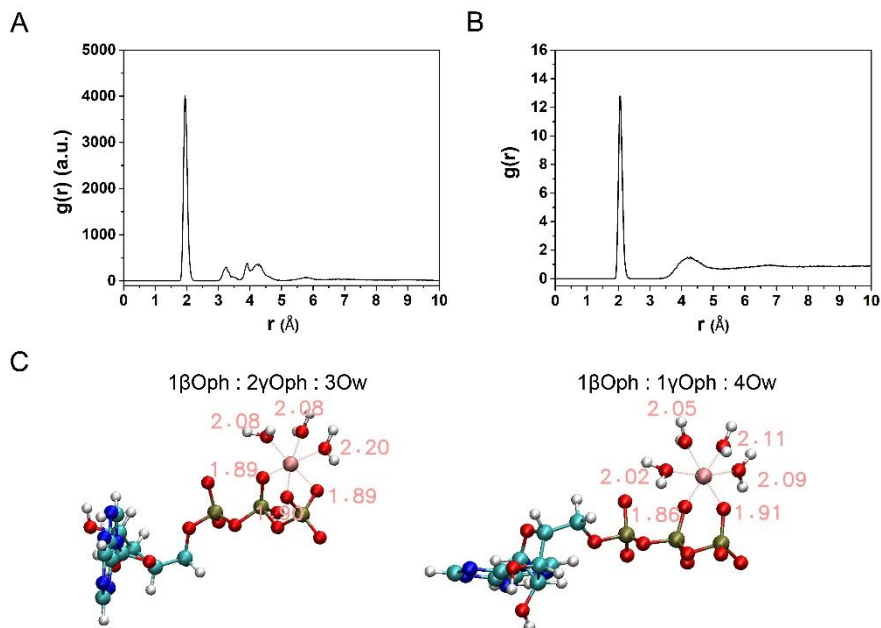

**Figure S1.** Radial distribution functions,  $g(r)$ , of ATP phosphate oxygens (A) and water oxygens (B) around  $Mg^{2+}$  in ATP-Mg solution. (C) Representative snapshots depicting the coordination of ATP phosphate groups and water molecules with  $Mg^{2+}$ . The average coordination distances for Mg-Ow (water oxygens) and Mg-Oph (phosphate oxygens) are 2.04 Å and 1.94 Å respectively, and the average coordination numbers of  $Mg^{2+}$  with Ow and Oph are 3.45 and 2.51 respectively. Atoms are colored as follows: Mg (pink), C (cyan), O (red), N (blue), P (tan), and H (white). The analyses are based on the last 50-ns trajectory.

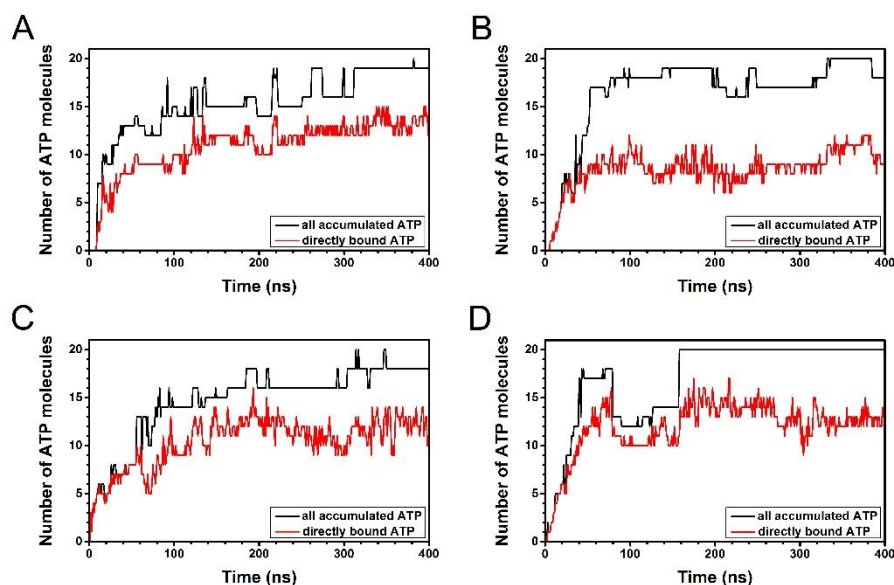

**Figure S2.** The number of ATPs accumulated around lysozyme for the other four trajectories.

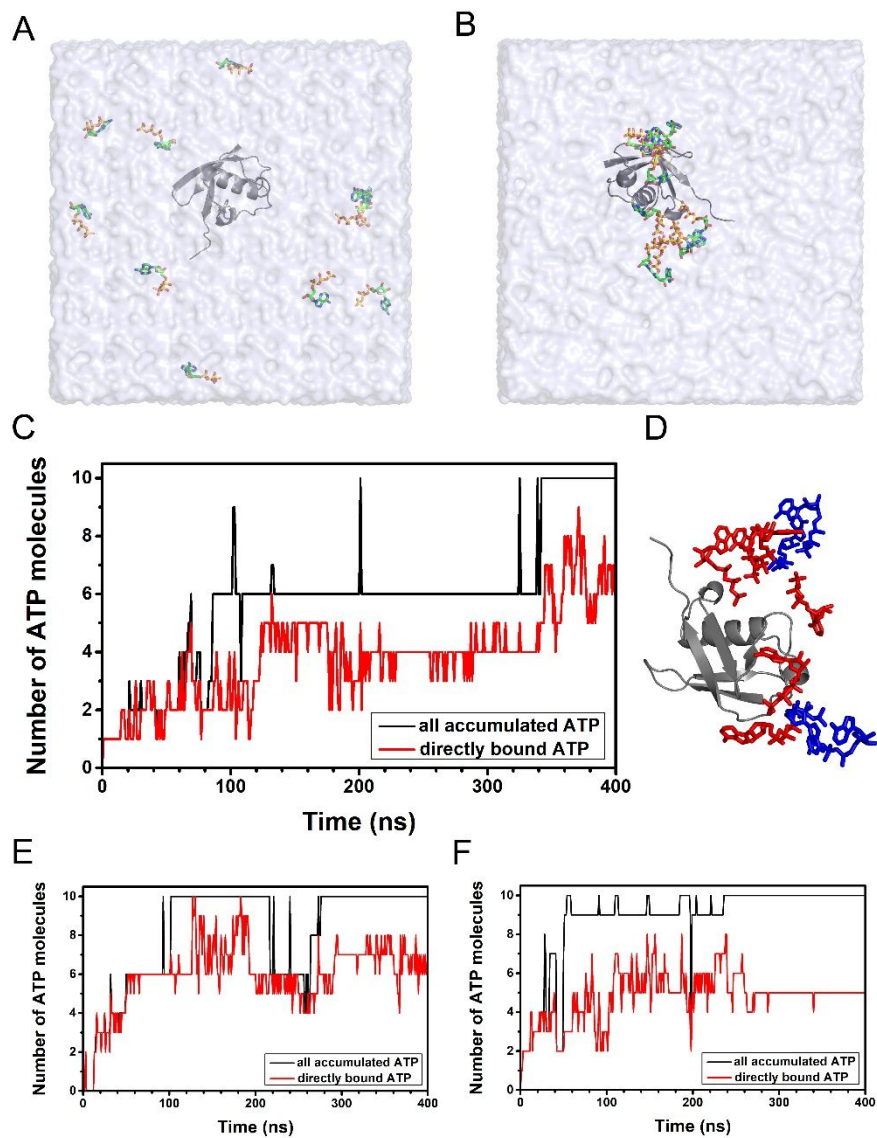

**Figure S3. Binding and accumulation of ATP around ubiquitin.** (A-B) Initial and final configurations of the ATP binding to protein. (C) The number of ATPs accumulated around protein (D) ATPs in direct (in red) and indirect (in blue) contact with protein. (E-F) The number of ATPs accumulated around protein for the other two trajectories.

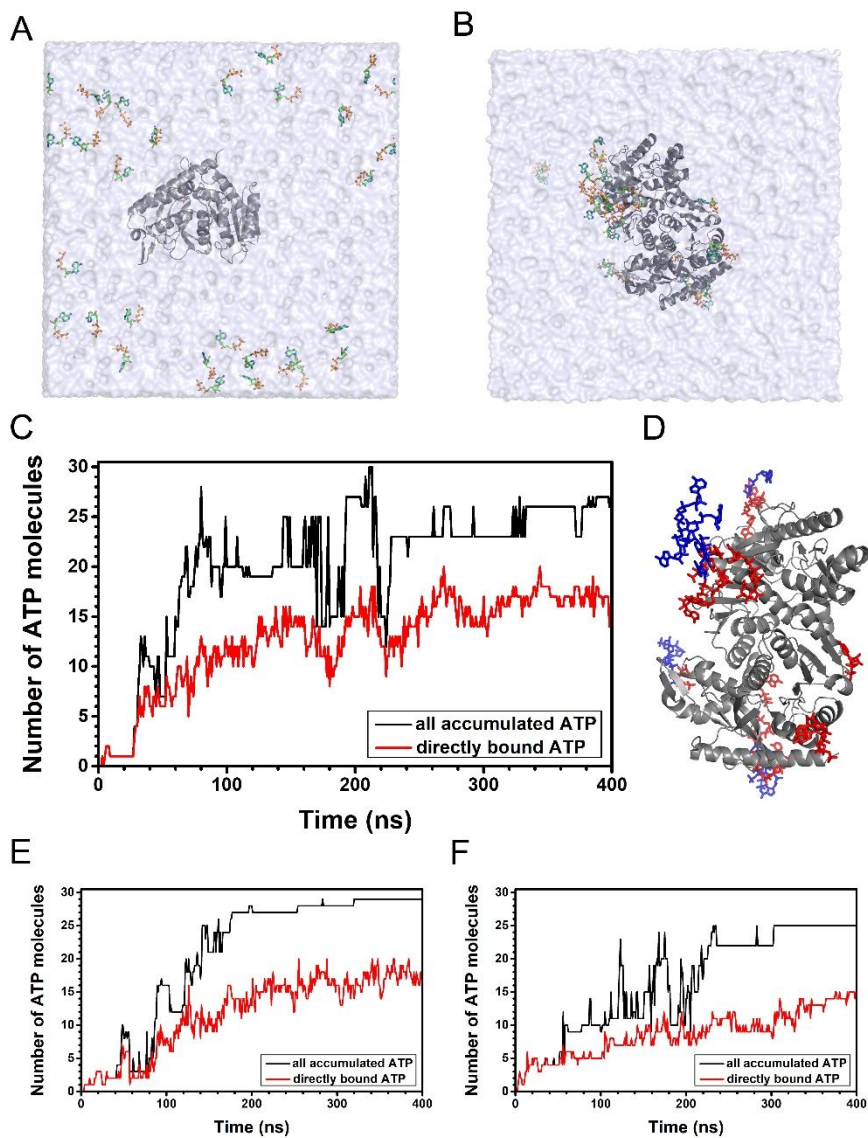

**Figure S4. Binding and accumulation of ATP around malate dehydrogenase.** (A-B) Initial and final configurations of the ATP binding to protein. (C) The number of ATPs accumulated around protein (D) ATPs in direct (in red) and indirect (in blue) contact with protein. (E-F) The number of ATPs accumulated around protein for the other two trajectories.

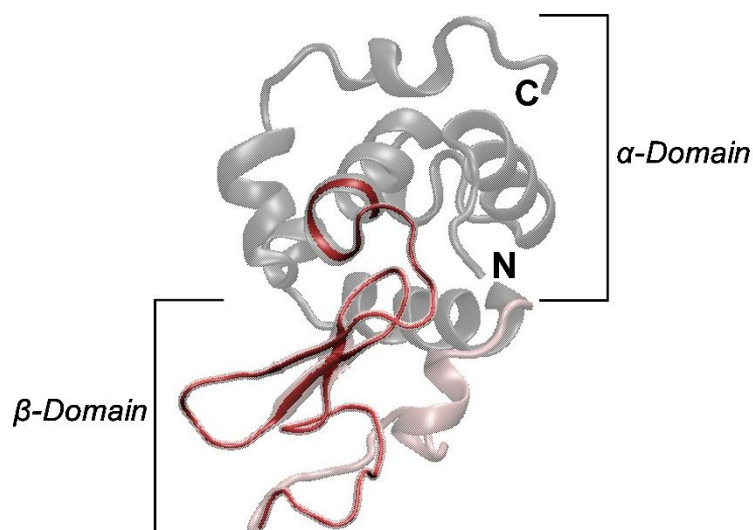

**Figure S5.** The schematic representation of the structure of lysozyme, which consists of  $\alpha$ -domain (colored in grey, residues: 1-39 and 88-129) and  $\beta$ -domain (colored in pink, residues: 40-87). The inter-domain loop (residues: 33-70) is colored in red.

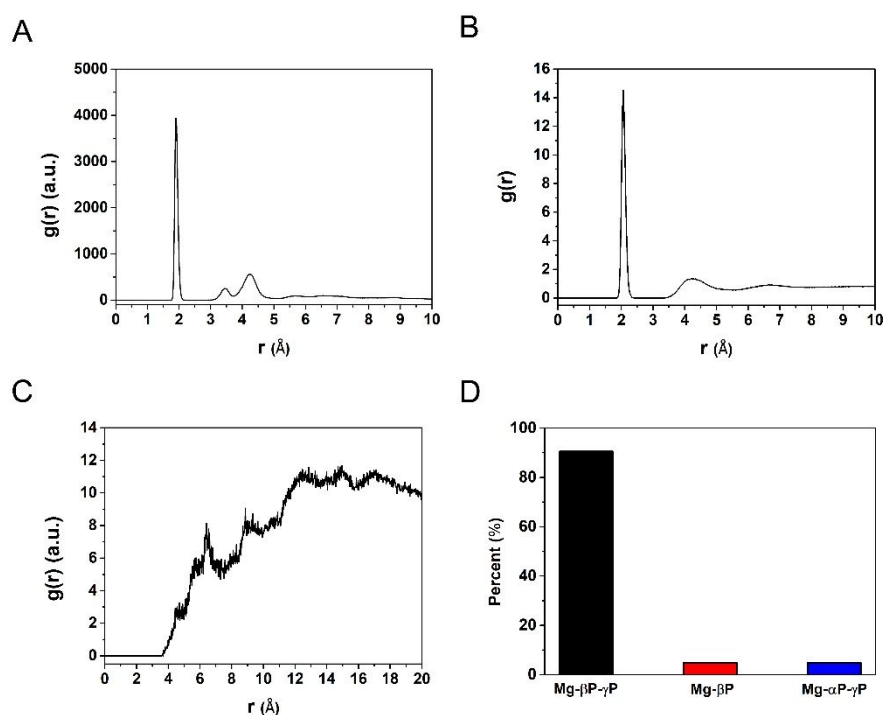

**Figure S6.** Radial distribution functions,  $g(r)$ , of ATP phosphate oxygens (A), water oxygens (B), and N, O atoms of lysozyme (C) around  $Mg^{2+}$ . (D) Histogram showing the population of each coordination mode of ATP-Mg complex. The average coordination distances for Mg-Ow and Mg-Oph are 2.06  $\text{\AA}$  and 1.90  $\text{\AA}$  respectively, and the average coordination numbers of  $Mg^{2+}$  with Ow and Oph is 3.95 and 2.05 respectively. The analyses are based on the last 160-ns trajectory.

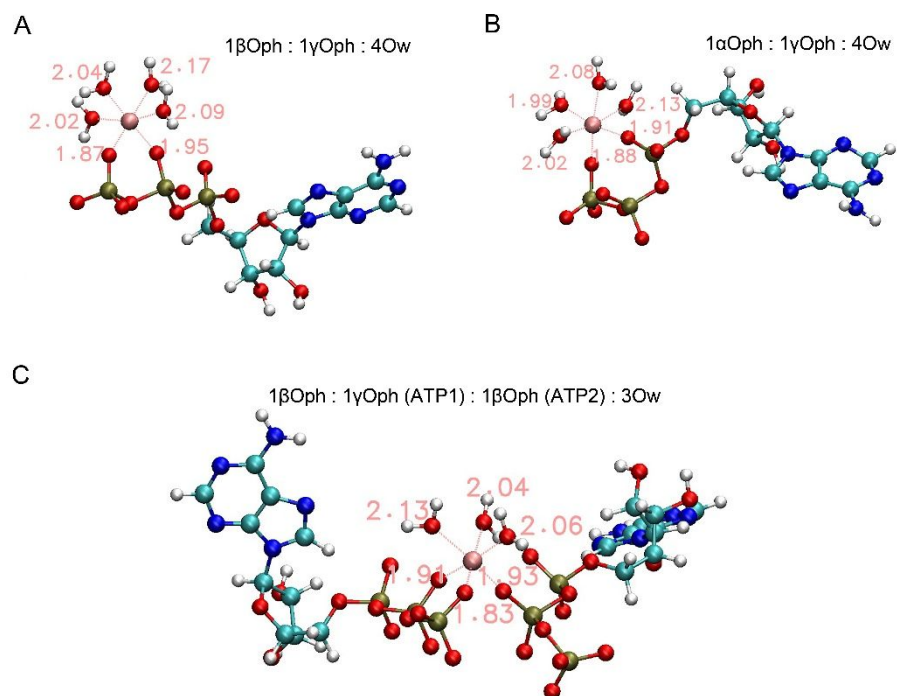

**Figure S7.** Representative snapshots depicting the coordination of ATP phosphate groups and water molecules with  $\text{Mg}^{2+}$  within the ATP-clusters on lysozyme.

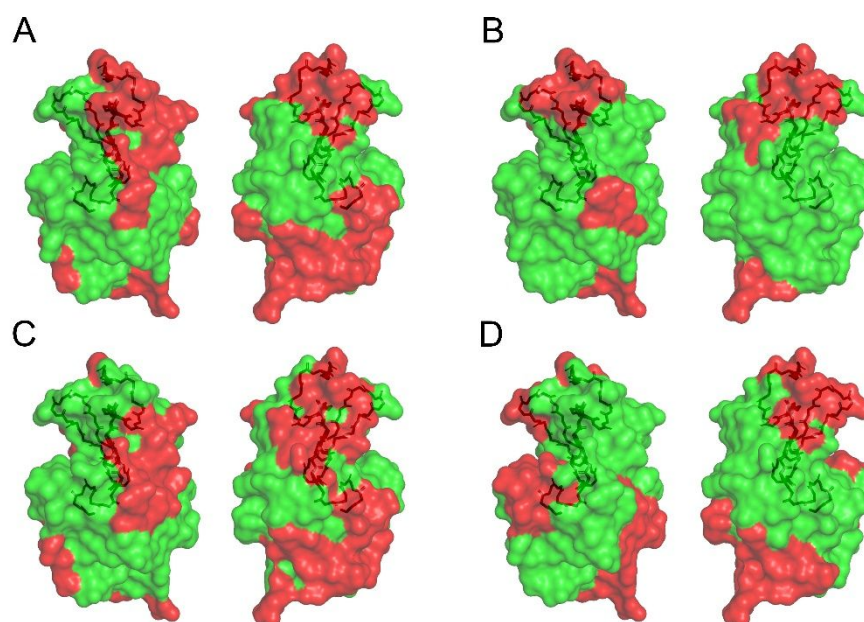

**Figure S8.** ATP-susceptible (red) and ATP-neutral (green) regions of lysozyme for the other four trajectories of ATP-Mg solution, the inter-domain loop is shown in sticks.



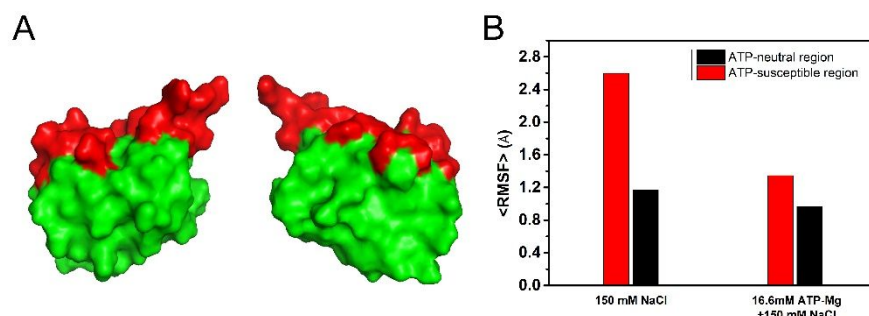

**Figure S9. ATP binding reduces the structural fluctuations of ubiquitin.** (A) ATP-susceptible (red) and ATP-neutral (green) regions of ubiquitin. (B) The average RMSF of the residues in the ATP-susceptible and ATP-neutral region.

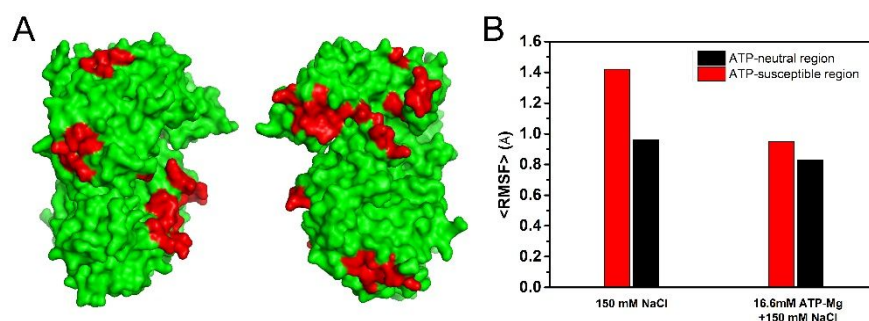

**Figure S10. ATP binding reduces the structural fluctuations of malate dehydrogenase.** (A) ATP-susceptible (red) and ATP-neutral (green) regions of malate dehydrogenase. (B) The average RMSF of the residues in the ATP-susceptible and ATP-neutral region.

Lysozyme: K33-T69

**KFESNFNTQATNRNTDGSTDYGILQINSRWWCNDGRT**

Sequence identity with Malate Dehydrogenase: 16.13% (calculated by CLUSTAL 2.1)

Ubiquitin: D39-D58

**DQQRLIFAGKQLEDGRTLSD**

Sequence identity with Malate Dehydrogenase: 25.00% (calculated by CLUSTAL 2.1)

Malate Dehydrogenase: D399-D432

**DVIATDKEEIAFKDLDVAILVGSMPPRRDGMERKD**

Sequence identity with Malate Dehydrogenase: --

**Figure S11.** The sequence identities of the amino acid segments corresponding to the vulnerable regions of lysozyme, ubiquitin, and malate dehydrogenase.

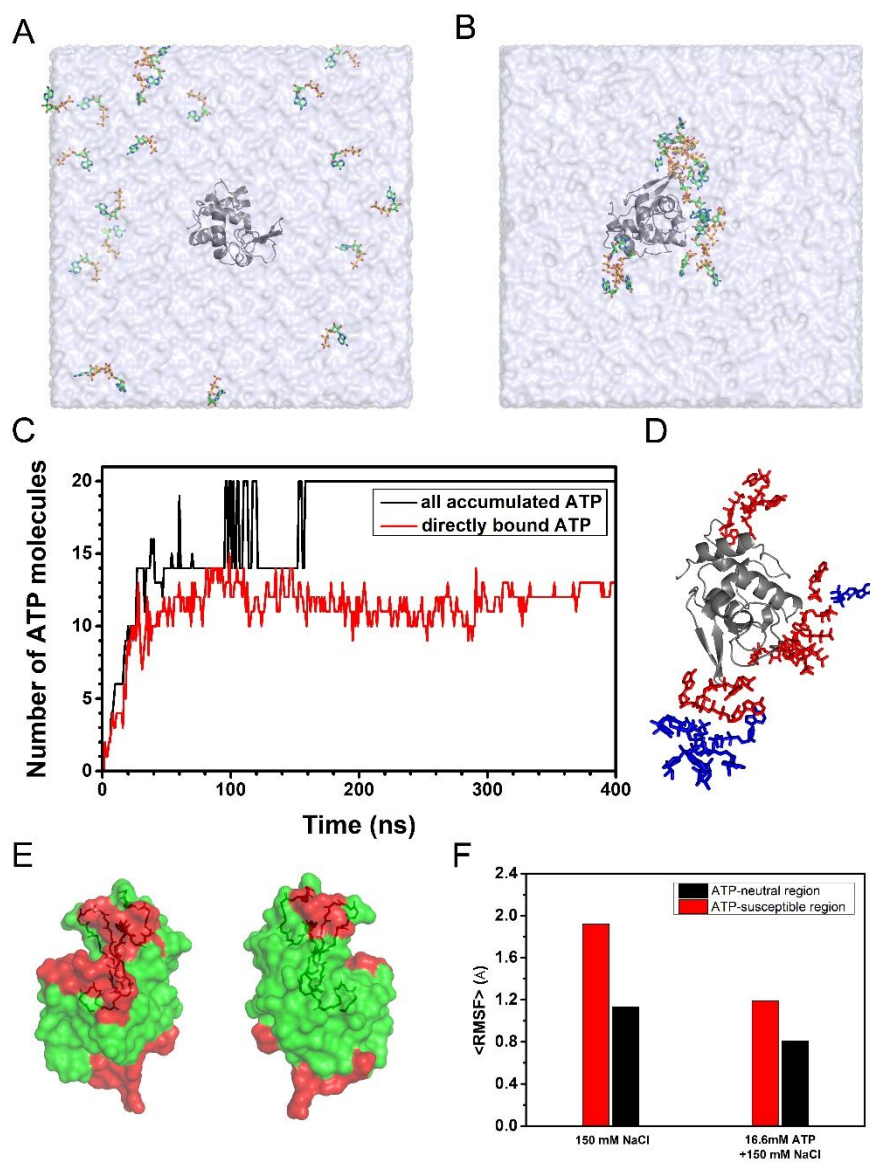

**Figure S12. Binding and accumulation of ATP around lysozyme in  $Mg^{2+}$ -free ATP solution (150 mM NaCl).** (A-B) Initial and final configurations of the ATP binding to protein. (C) The number of ATPs accumulated around protein (D) ATPs in direct (in red) and indirect (in blue) contact with protein. (E) ATP-susceptible (red) and ATP-neutral (green) regions of lysozyme, the inter-domain loop is shown in sticks. (F) The average RMSF of the residues in the ATP-susceptible and ATP-neutral region.

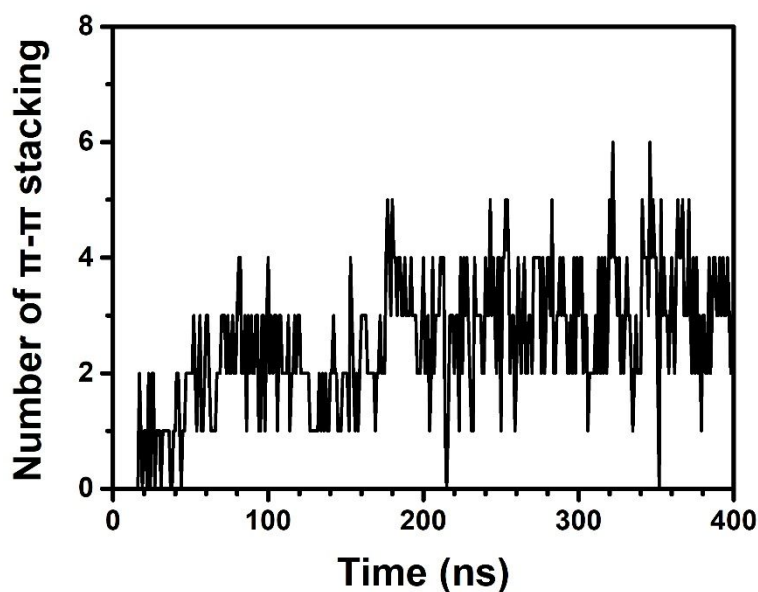

**Figure S13.** The number of  $\pi$ - $\pi$  stacking interactions between the accumulated ATPs (the COM distance between two adenine bases is less than 5 Å) in  $Mg^{2+}$ -free ATP solution.

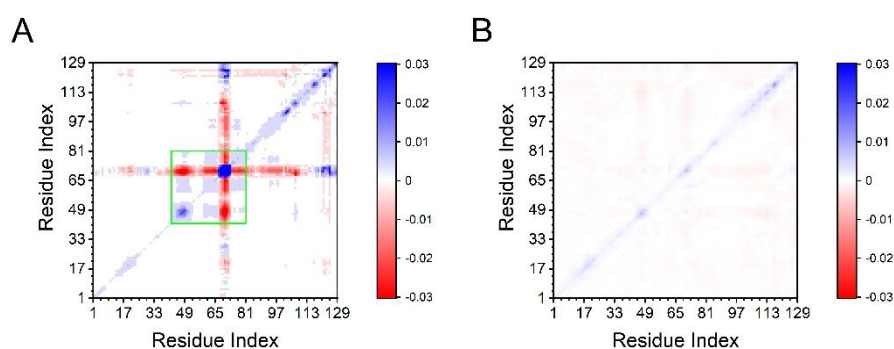

**Figure S14.** The dynamical cross-correlation matrices of the C-alpha atoms of free lysozyme (A, 150 mM NaCl) and ATP-bound lysozyme (B, 16.6 mM ATP-Mg, based on the last 160-ns trajectory). The positive covariance  $C_{ij}$  suggests a correlated motion between the residue  $i$  and  $j$ , whereas the negative covariance suggests an anti-correlated motion. The areas in blue and red correspond to the correlated and anti-correlated motions, respectively. The region with strong cross-correlation motions is highlighted in the green box. The color scale is in  $\text{nm}^2$ .

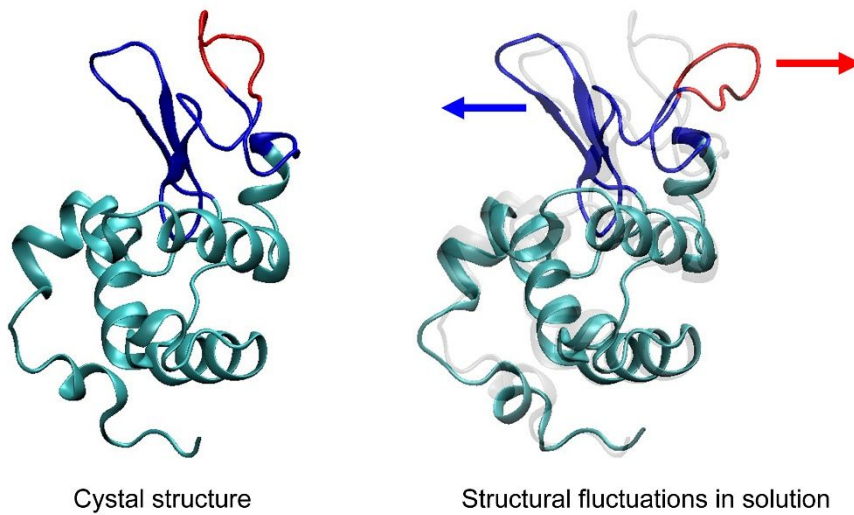

**Figure S15.** Snapshots illustrating the structural fluctuation of free lysozyme in 150 mM NaCl solution. Residues 42-65, 75-81 are shown in blue (correlated movements), 66-74 in red (anti-correlated movements), other residues in cyan.

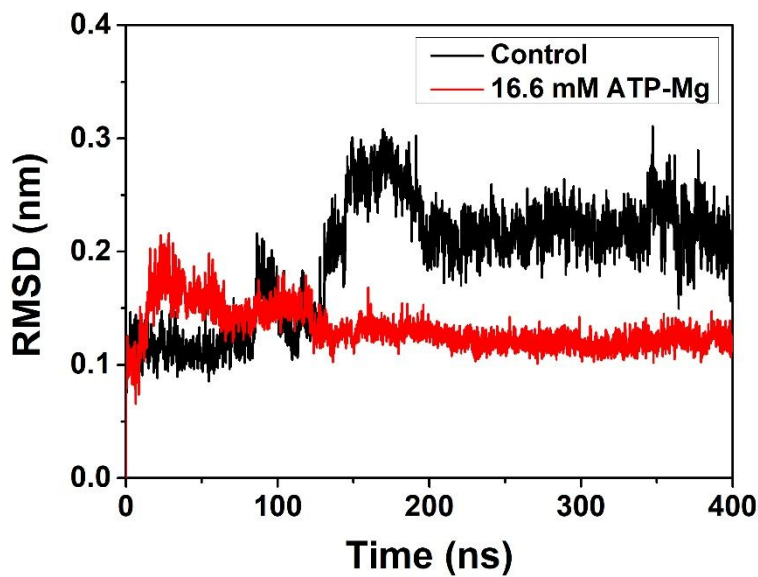

**Figure S16.** RMSD of backbone atoms with respect to the crystal structure for lysozyme in 150 mM NaCl solution and 16.6 mM ATP-Mg solution, respectively.

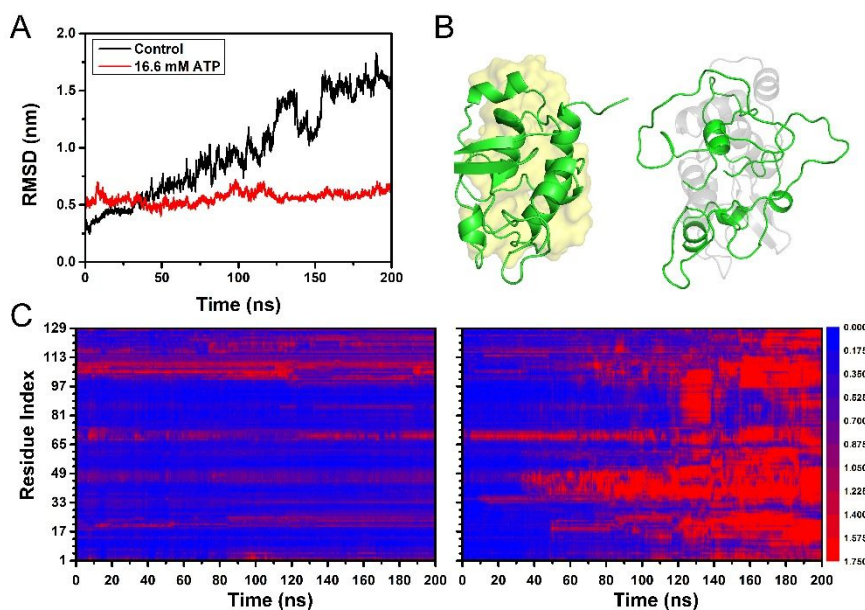

**Figure S17. Structural characterization of free lysozyme and ATP-bound lysozyme in  $Mg^{2+}$ -free ATP solution (150 mM NaCl) at  $T = 430$  K.** (A) RMSD of free protein and ATP-bound protein with respect to the crystal structure. (B) Representative snapshot of the free protein (right panel, the native structure is shown in shaded grey) and ATP-bound protein (left panel, ATP-clusters are shown in shaded yellow). (C) RMSD of residues of the free protein (right panel) and ATP-bound protein (left panel). The color scale represents the range of RMSD.

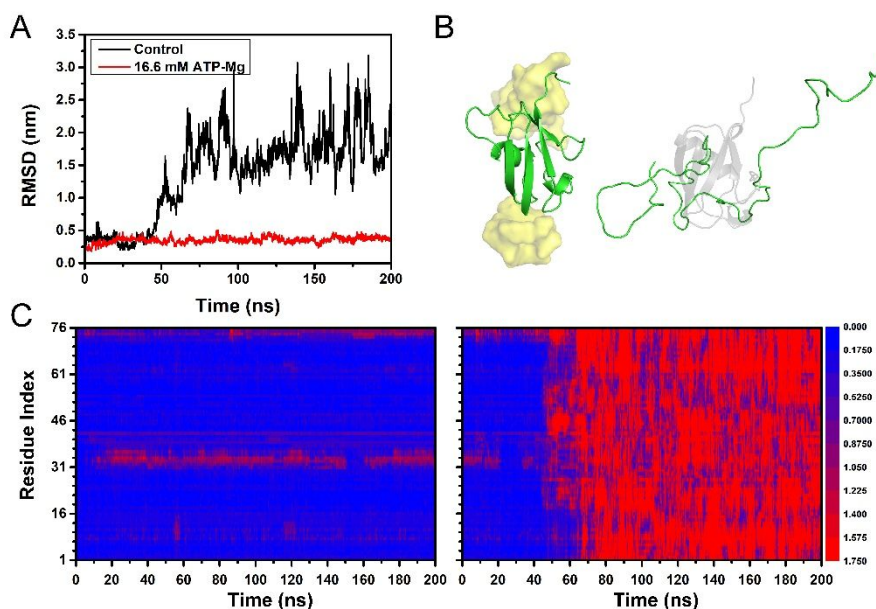

**Figure S18. Structural characterization of free ubiquitin and ATP-bound ubiquitin at  $T = 490$  K.** (A) RMSD of free protein and ATP-bound protein with respect to the crystal structure. (B) Representative snapshot of the free protein (right panel, the native structure is shown in shaded grey) and ATP-bound protein (left panel, ATP-clusters are shown in shaded yellow). (C) RMSD of residues of the free protein (right panel) and ATP-bound protein (left panel). The color scale represents the range of

RMSD.

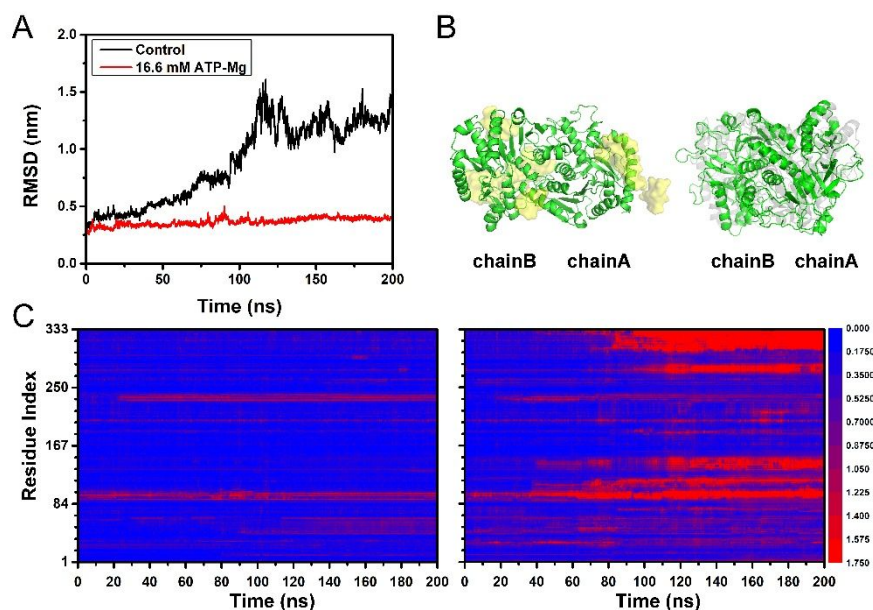

**Figure S19. Structural characterization of free malate dehydrogenase and ATP-bound malate dehydrogenase at  $T = 450$  K.** (A) RMSD of chain A of the free protein and ATP-bound protein with respect to the crystal structure. (B) Representative snapshot of the free protein (right panel, the native structure is shown in shaded grey) and ATP-bound protein (left panel, ATP-clusters are shown in shaded yellow). (C) RMSD of residues of chain A of the free protein (right panel) and ATP-bound protein (left panel). The color scale represents the range of RMSD.

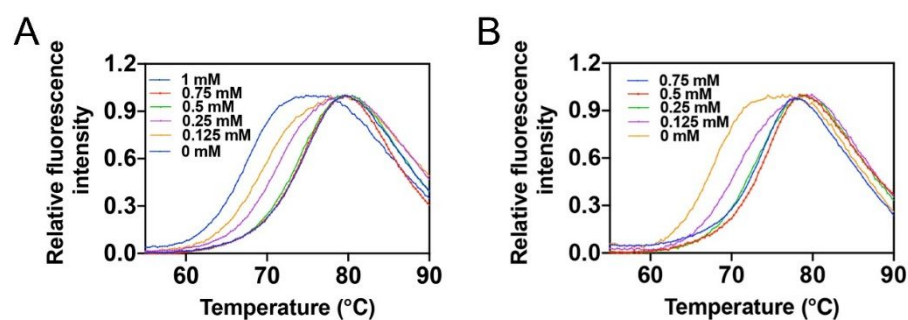

**Figure S20.** (A) Typical normalized melting curves for lysozyme at varied ATP-Mg concentrations. (B) Typical normalized melting curves for lysozyme at varied ATP concentrations in  $Mg^{2+}$ -free ATP solution.

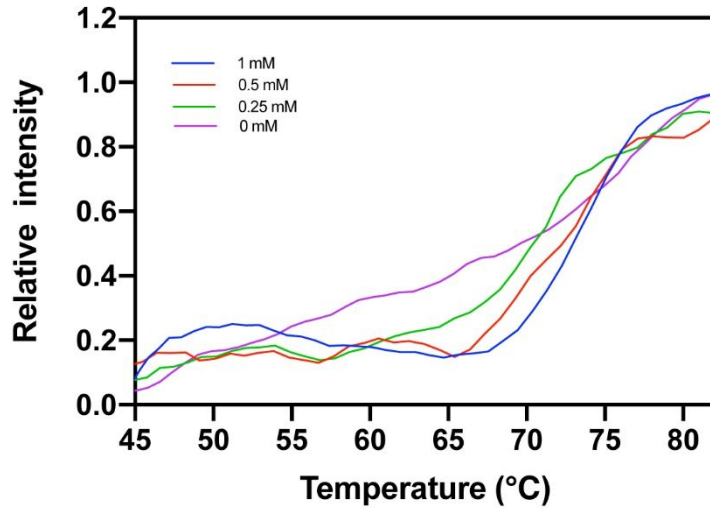

**Figure S21. Circular dichroism spectra.** The thermally induced ellipticity changes at 222 nm for lysozyme in the solutions with various ATP-Mg concentrations.

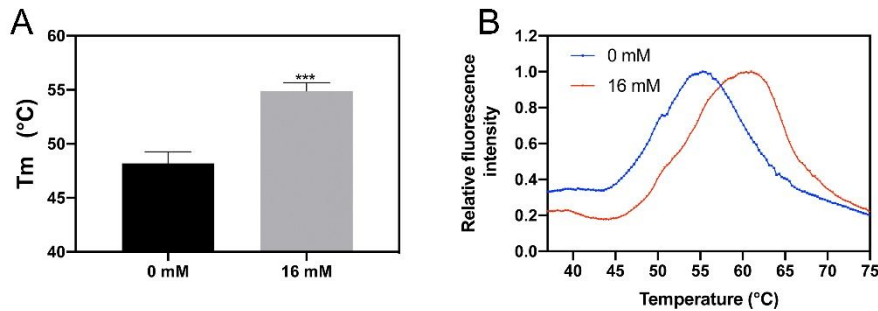

**Figure S22. Thermal shift assay for malate dehydrogenase.** (A) The relationship of the melting temperature with ATP-Mg concentration. (B) Typical normalized melting curves.

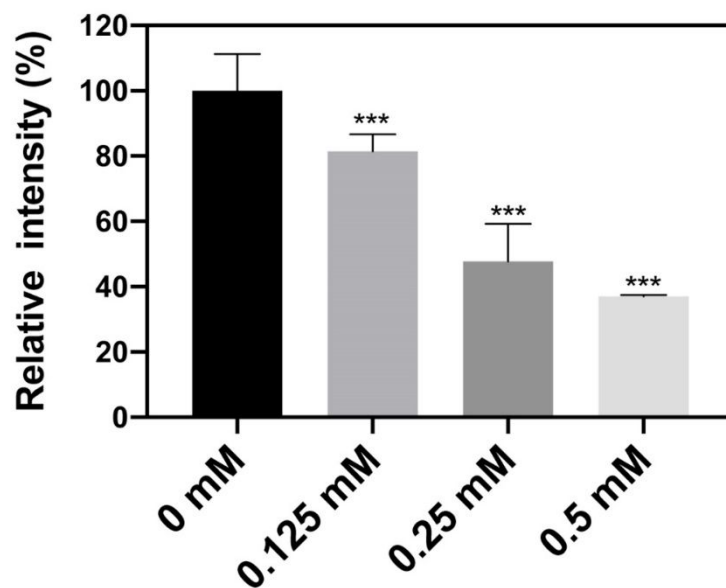

**Figure S23.** The summarized ANS fluorescence intensity for lysozyme in the solutions

with various ATP-Mg concentrations.
